# Supplementary material for: In-silico assessment of phytochemical derivatives generated using CHEESE webserver for advancement of druggable candidate in pancreatic cancer therapy
Source: In Silico Pharmacol. 2026 Jan 14;14(1):32. doi: 10.1007/s40203-025-00536-w (PMC12804539; doi:10.1007/s40203-025-00536-w)
Supplement: Supplementary file 1 — Supplementary Material 1 [file 40203_2025_536_MOESM1_ESM.xlsx]

## Sheet: Moracin P
smiles	zinc_id	caco2_wang	lipophilicity_astrazeneca	solubility_aqsoldb	bioavailability_ma	hia_hou	pgp_broccatelli	clogp	clearance_hepatocyte_az	clearance_microsome_az	half_life_obach	ld50_zhu	ames	dili	herg	ppbr_az	vdss_lombardo	bbb_martins	cyp2c9_veith	cyp2d6_veith	cyp3a4_veith	molecular_weight	formal_charge	heavy_atoms	h_bond_acceptors	h_bond_donor	rotatable_bonds	num_of_rings	molar_refractivity	number_of_atoms	topological_surface_area_mapping
CC1=CC=C(C2=NC(=CC3=CC=C([N+](=O)[O-])S3)C(=O)O2)C=C1C	ENAMINE-REAL : Z1642390909	-4.671	2.916	-6.706	1	0.999	0.002	3.61764	77.662	100.188	6.307	2.122	0.999	1	0.002	83.586	2.367	0.997	0.98	0.036	0.139	328.052	0	23	6	0	3	3	87.4954	23	81.8
CC1=CC=C(C2=NC(=CC3=CC=C([N+](=O)[O-])O3)C(=O)O2)C=C1C	ENAMINE-REAL : Z31323896	-5.145	2.877	-5.444	1	0.999	0.008	3.14914	91.831	73.066	9.934	2.597	1	1	0.001	87.612	2.882	0.998	0.469	0	0.047	312.075	0	23	6	0	3	3	81.8844	23	94.94
O=C1OC(C2=CC3=C(CCC3)S2)=NC1=CC1=CC=C(C(=O)O)C=C1	ENAMINE-REAL : Z1123898030	-4.441	0.788	-4.868	0.984	1	0.016	3.2795	78.147	73.956	-0.897	2.285	0.02	1	0.014	96.249	1.295	0.885	0.585	0.004	0.044	339.057	0	24	5	1	3	4	90.3513	24	75.96
CCOC1=CC=C(C2=NC(=CC3=CSC([N+](=O)[O-])=C3)C(=O)O2)C=C1OCC	ENAMINE-REAL : Z729909024	-4.863	3.414	-6.423	0.999	0.963	0.972	3.7982	99.356	63.473	13.701	2.148	0.965	1	0.354	88.074	2.862	0.995	0.957	0.001	0.943	388.073	0	27	8	0	7	3	100.359	27	100.26
O=C1OC(C2=CC=C(Br)S2)=NC1=CC1=CC2=C(C=C1[N+](=O)[O-])OCO2	ENAMINE-REAL : Z729924972	-4.478	2.993	-5.64	0.997	0.998	0.084	3.492	83.288	33.26	17.134	2.131	0.998	1	0.091	75.342	4.255	0.915	0.739	0.013	0.878	421.921	0	25	8	0	3	4	91.8444	25	100.26
CC(=O)OC1=CC=C(C2=NC(=CC3=CC=C([N+](=O)[O-])S3)C(=O)O2)C=C1	ENAMINE-REAL : Z1642391329	-4.604	2.944	-6.201	0.985	0.999	0.003	2.9261	105.474	78.658	10.095	2.378	0.999	1	0.001	86.764	2.365	0.519	0.328	0.011	0.135	358.026	0	25	8	0	4	3	89.3304	25	108.1
CC1=CC=C(C2=NC(=CC3=CC=C([N+](=O)[O-])O3)C(=O)O2)C=C1	ENAMINE-REAL : Z31309984	-5.158	2.865	-5.236	0.999	0.996	0.003	2.84072	97.498	77.402	11.248	2.361	1	1	0	77.708	2.576	0.995	0.563	0	0.007	298.059	0	22	6	0	3	3	77.1474	22	94.94
CN(C)C1=CC=C(C=CC2=NN=C(C3CC4CCC3O4)S2)C=C1	ENAMINE-REAL : Z4562267692	-4.601	2.443	-4.426	0.998	1	0.387	3.8094	27.899	7.814	18.188	2.556	0.657	0.182	0.995	84.701	2.98	0.999	0.054	0.006	0.107	327.141	0	23	5	0	4	4	94.859	23	38.25
CC1=C(C2=NC(=CC3=C(C(C)(C)C)OC=N3)C(=O)O2)C=CO1	ENAMINE-REAL : Z3996032430	-4.354	3.234	-4.344	0.999	0.999	0.001	3.21802	67.051	95.366	12.941	2.826	0.966	0.998	0.025	95.552	2.576	1	0.662	0	0.478	300.111	0	22	6	0	2	3	79.254	22	77.83
CCOC1=CC=C(C2=NC(=CC3=CC=C([N+](=O)[O-])O3)C(=O)O2)C=C1OCC	ENAMINE-REAL : Z31317504	-5.221	3.121	-5.817	0.997	0.997	0.536	3.3297	100.017	88.891	6.661	2.756	0.918	1	0.72	89.682	2.724	0.973	0.835	0.003	0.974	372.096	0	27	8	0	7	3	94.7484	27	113.4
