# Supplementary material for: In-silico assessment of phytochemical derivatives generated using CHEESE webserver for advancement of druggable candidate in pancreatic cancer therapy
Source: In Silico Pharmacol. 2026 Jan 14;14(1):32. doi: 10.1007/s40203-025-00536-w (PMC12804539; doi:10.1007/s40203-025-00536-w)
Supplement: Supplementary file 2 — Supplementary Material 2 [file 40203_2025_536_MOESM2_ESM.xlsx]

## Sheet: Naringenin 5-rhamnoside
smiles	zinc_id	caco2_wang	lipophilicity_astrazeneca	solubility_aqsoldb	bioavailability_ma	hia_hou	pgp_broccatelli	clogp	clearance_hepatocyte_az	clearance_microsome_az	half_life_obach	ld50_zhu	ames	dili	herg	ppbr_az	vdss_lombardo	bbb_martins	cyp2c9_veith	cyp2d6_veith	cyp3a4_veith	molecular_weight	formal_charge	heavy_atoms	h_bond_acceptors	h_bond_donor	rotatable_bonds	num_of_rings	molar_refractivity	number_of_atoms	topological_surface_area_mapping
CC[C@H]1OC(=O)C(Oc2cc(O)cc3c2C(=O)C[C@H](c2ccc(O)cc2)O3)=C1C	ZINC15 : ZINC001226496196_a	-5.188	1.577	-5.108	0.579	0.998	0.775	3.7925	50.729	26.365	176.186	3.449	0.205	0.998	0.854	98.042	2.344	0.751	0.991	0.003	0.347	396.121	0	29	7	2	4	4	102.029	29	102.29
CC[C@@H]1OC(=O)C(Oc2cc(O)cc3c2C(=O)C[C@H](c2ccc(O)cc2)O3)=C1C	ZINC15 : ZINC001226496195_a	-5.188	1.577	-5.108	0.579	0.998	0.775	3.7925	50.729	26.365	176.186	3.449	0.205	0.998	0.854	98.042	2.344	0.751	0.991	0.003	0.347	396.121	0	29	7	2	4	4	102.029	29	102.29
CC[C@H]1OC(=O)C(Oc2cc([O-])cc3c2C(=O)C[C@H](c2ccc(O)cc2)O3)=C1C	ZINC15 : ZINC001226496196	-5.149	0.41	-4.41	0.734	0.998	0.415	3.1605	58.006	47.971	5.656	3.483	0.231	0.997	0.171	95.78	2.58	0.899	0.997	0.001	0.033	395.114	-1	29	7	1	4	4	99.8103	29	105.12
CC[C@@H]1OC(=O)C(Oc2cc([O-])cc3c2C(=O)C[C@H](c2ccc(O)cc2)O3)=C1C	ZINC15 : ZINC001226496195	-5.149	0.41	-4.41	0.734	0.998	0.415	3.1605	58.006	47.971	5.656	3.483	0.231	0.997	0.171	95.78	2.58	0.899	0.997	0.001	0.033	395.114	-1	29	7	1	4	4	99.8103	29	105.12
C[C@H]1C[NH2+]CCC[C@H]1Oc1cc(O)cc2c1C(=O)C[C@H](c1ccc(O)cc1)O2	ZINC15 : ZINC001217990789	-5.439	-0.182	-2.807	0.858	0.338	0.41	2.545	24.081	-5.648	10.815	2.662	0.056	0.106	0.246	60.592	6.392	0.716	0	0.009	0.058	384.181	1	28	5	3	3	4	103.004	28	92.6
C[C@@H]1C[NH2+]CCC[C@H]1Oc1cc(O)cc2c1C(=O)C[C@H](c1ccc(O)cc1)O2	ZINC15 : ZINC001217990790	-5.439	-0.182	-2.807	0.858	0.338	0.41	2.545	24.081	-5.648	10.815	2.662	0.056	0.106	0.246	60.592	6.392	0.716	0	0.009	0.058	384.181	1	28	5	3	3	4	103.004	28	92.6
C[C@@H]1C[NH2+]CCC[C@@H]1Oc1cc(O)cc2c1C(=O)C[C@H](c1ccc(O)cc1)O2	ZINC15 : ZINC001217990791	-5.439	-0.182	-2.807	0.858	0.338	0.41	2.545	24.081	-5.648	10.815	2.662	0.056	0.106	0.246	60.592	6.392	0.716	0	0.009	0.058	384.181	1	28	5	3	3	4	103.004	28	92.6
C[C@H]1C[NH2+]CCC[C@@H]1Oc1cc(O)cc2c1C(=O)C[C@H](c1ccc(O)cc1)O2	ZINC15 : ZINC001217990788	-5.439	-0.182	-2.807	0.858	0.338	0.41	2.545	24.081	-5.648	10.815	2.662	0.056	0.106	0.246	60.592	6.392	0.716	0	0.009	0.058	384.181	1	28	5	3	3	4	103.004	28	92.6
CC[C@@H]1OC(C)=C(Oc2cc(O)cc3c2C(=O)C[C@H](c2ccc(O)cc2)O3)C1=O	ZINC15 : ZINC001226495729	-5.193	2.878	-5.16	0.706	1	0.942	3.7925	54.342	24.123	183.152	3.271	0.078	0.995	0.963	98.427	2.462	0.91	0.775	0	0.741	396.121	0	29	7	2	4	4	102.029	29	102.29
CC[C@H]1OC(C)=C(Oc2cc(O)cc3c2C(=O)C[C@H](c2ccc(O)cc2)O3)C1=O	ZINC15 : ZINC001226495730	-5.193	2.878	-5.16	0.706	1	0.942	3.7925	54.342	24.123	183.152	3.271	0.078	0.995	0.963	98.427	2.462	0.91	0.775	0	0.741	396.121	0	29	7	2	4	4	102.029	29	102.29
