# Supplementary material for: In-silico assessment of phytochemical derivatives generated using CHEESE webserver for advancement of druggable candidate in pancreatic cancer therapy
Source: In Silico Pharmacol. 2026 Jan 14;14(1):32. doi: 10.1007/s40203-025-00536-w (PMC12804539; doi:10.1007/s40203-025-00536-w)
Supplement: Supplementary file 3 — Supplementary Material 3 [file 40203_2025_536_MOESM3_ESM.xlsx]

## Sheet: Phytocassane A
smiles	zinc_id	caco2_wang	lipophilicity_astrazeneca	solubility_aqsoldb	bioavailability_ma	hia_hou	pgp_broccatelli	clogp	clearance_hepatocyte_az	clearance_microsome_az	half_life_obach	ld50_zhu	ames	dili	herg	ppbr_az	vdss_lombardo	bbb_martins	cyp2c9_veith	cyp2d6_veith	cyp3a4_veith	molecular_weight	formal_charge	heavy_atoms	h_bond_acceptors	h_bond_donor	rotatable_bonds	num_of_rings	molar_refractivity	number_of_atoms	topological_surface_area_mapping
CC(=O)[C@]1(O)CC[C@H]2[C@H]1CC(=O)[C@@H]1[C@H]2CC[C@]2(C)C[C@H](O)CC[C@]12C	ZINC15 : ZINC000263609967	-4.692	2.373	-3.69	0.265	1	0.001	2.8891	59.696	17.151	2.983	2.997	0.016	0.097	0.097	66.282	0.508	0.993	0.002	0	0	348.23	0	25	4	2	1	4	93.7546	25	74.6
CC(=O)[C@]1(O)CC[C@H]2[C@H]1CC(=O)[C@H]1[C@H]2CC[C@]2(C)C[C@H](O)CC[C@]12C	ZINC15 : ZINC000263609968	-4.692	2.373	-3.69	0.265	1	0.001	2.8891	59.696	17.151	2.983	2.997	0.016	0.097	0.097	66.282	0.508	0.993	0.002	0	0	348.23	0	25	4	2	1	4	93.7546	25	74.6
CC(=O)[C@]1(O)CC[C@H]2[C@@H]1CC(=O)[C@@H]1[C@H]2CC[C@]2(C)C[C@H](O)CC[C@]12C	ZINC15 : ZINC000263609966	-4.692	2.373	-3.69	0.265	1	0.001	2.8891	59.696	17.151	2.983	2.997	0.016	0.097	0.097	66.282	0.508	0.993	0.002	0	0	348.23	0	25	4	2	1	4	93.7546	25	74.6
CC(=O)[C@]1(O)CC[C@H]2[C@@H]1CC(=O)[C@H]1[C@H]2CC[C@]2(C)C[C@H](O)CC[C@]12C	ZINC15 : ZINC000263609969	-4.692	2.373	-3.69	0.265	1	0.001	2.8891	59.696	17.151	2.983	2.997	0.016	0.097	0.097	66.282	0.508	0.993	0.002	0	0	348.23	0	25	4	2	1	4	93.7546	25	74.6
CC(=O)[C@]1(O)[C@H](C)C[C@@H]2[C@@H]3CC[C@@H]4C[C@H](O)CC[C@@]4(C)C3=CC[C@@]21C	ZINC15 : ZINC000253497334	-4.698	3.4	-4.217	0.517	1	0.085	3.8762	104.178	43.583	9.384	2.762	0.002	0.009	0.019	95.82	1.609	0.996	0.195	0	0	346.251	0	25	3	2	1	4	97.8876	25	57.53
CC(=O)[C@]1(O)[C@H](C)C[C@@H]2[C@@H]3CC[C@@H]4C[C@H](O)CC[C@]4(C)C3=CC[C@]21C	ZINC15 : ZINC000253497332	-4.698	3.4	-4.217	0.517	1	0.085	3.8762	104.178	43.583	9.384	2.762	0.002	0.009	0.019	95.82	1.609	0.996	0.195	0	0	346.251	0	25	3	2	1	4	97.8876	25	57.53
CC(=O)[C@]1(O)[C@H](C)C[C@@H]2[C@@H]3CC[C@@H]4C[C@H](O)CC[C@@]4(C)C3=CC[C@]21C	ZINC15 : ZINC000253497333	-4.698	3.4	-4.217	0.517	1	0.085	3.8762	104.178	43.583	9.384	2.762	0.002	0.009	0.019	95.82	1.609	0.996	0.195	0	0	346.251	0	25	3	2	1	4	97.8876	25	57.53
CC(=O)[C@]1(O)[C@H](C)C[C@@H]2[C@@H]3CC[C@@H]4C[C@H](O)CC[C@]4(C)C3=CC[C@@]21C	ZINC15 : ZINC000004612836	-4.698	3.4	-4.217	0.517	1	0.085	3.8762	104.178	43.583	9.384	2.762	0.002	0.009	0.019	95.82	1.609	0.996	0.195	0	0	346.251	0	25	3	2	1	4	97.8876	25	57.53
CC(=O)[C@]1(O)CC[C@@H]2[C@H]3CC=C4C[C@H](O)CC[C@]4(C)[C@@H]3C(=O)C[C@]21C	ZINC15 : ZINC000257346268	-4.441	2.568	-3.481	0.07	1	0.003	2.8092	58.1	23.099	4.324	3.465	0.072	0.004	0.002	73.185	1.656	0.984	0	0	0	346.214	0	25	4	2	1	4	93.7306	25	74.6
CC(=O)[C@]1(O)CC[C@@H]2[C@H]3CC=C4C[C@@H](O)CC[C@]4(C)[C@@H]3C(=O)C[C@]21C	ZINC15 : ZINC000257346270	-4.441	2.568	-3.481	0.07	1	0.003	2.8092	58.1	23.099	4.324	3.465	0.072	0.004	0.002	73.185	1.656	0.984	0	0	0	346.214	0	25	4	2	1	4	93.7306	25	74.6
