# Supplementary material for: In-silico assessment of phytochemical derivatives generated using CHEESE webserver for advancement of druggable candidate in pancreatic cancer therapy
Source: In Silico Pharmacol. 2026 Jan 14;14(1):32. doi: 10.1007/s40203-025-00536-w (PMC12804539; doi:10.1007/s40203-025-00536-w)
Supplement: Supplementary file 4 — Supplementary Material 4 [file 40203_2025_536_MOESM4_ESM.xlsx]

## Sheet: Sakuranin
smiles	zinc_id	caco2_wang	lipophilicity_astrazeneca	solubility_aqsoldb	bioavailability_ma	hia_hou	pgp_broccatelli	clogp	clearance_hepatocyte_az	clearance_microsome_az	half_life_obach	ld50_zhu	ames	dili	herg	ppbr_az	vdss_lombardo	bbb_martins	cyp2c9_veith	cyp2d6_veith	cyp3a4_veith	molecular_weight	formal_charge	heavy_atoms	h_bond_acceptors	h_bond_donor	rotatable_bonds	num_of_rings	molar_refractivity	number_of_atoms	topological_surface_area_mapping
COc1cc(O[C@H]2O[C@@H](CO)[C@@H](O)[C@@H](O)[C@H]2O)c2c(c1)O[C@@H](c1ccc(O)cc1)CC2=O	ZINC15 : ZINC000005742781	-6.791	1.45	-2.731	0.304	0.301	0.005	0.286	7.031	52.199	1.516	3.235	0.771	0.9	0.898	74.244	2.764	0.024	0	0	0	448.137	0	32	10	5	5	4	107.812	32	155.14
COc1cc(O[C@H]2O[C@@H](CO)[C@@H](O)[C@@H](O)[C@@H]2O)c2c(c1)O[C@@H](c1ccc(O)cc1)CC2=O	ZINC15 : ZINC000005742784	-6.791	1.45	-2.731	0.304	0.301	0.005	0.286	7.031	52.199	1.516	3.235	0.771	0.9	0.898	74.244	2.764	0.024	0	0	0	448.137	0	32	10	5	5	4	107.812	32	155.14
COc1cc(O[C@@H]2O[C@@H](CO)[C@@H](O)[C@@H](O)[C@H]2O)c2c(c1)O[C@@H](c1ccc(O)cc1)CC2=O	ZINC15 : ZINC000005742783	-6.791	1.45	-2.731	0.304	0.301	0.005	0.286	7.031	52.199	1.516	3.235	0.771	0.9	0.898	74.244	2.764	0.024	0	0	0	448.137	0	32	10	5	5	4	107.812	32	155.14
COc1cc(O[C@@H]2O[C@@H](CO)[C@@H](O)[C@@H](O)[C@@H]2O)c2c(c1)O[C@@H](c1ccc(O)cc1)CC2=O	ZINC15 : ZINC000005742785	-6.791	1.45	-2.731	0.304	0.301	0.005	0.286	7.031	52.199	1.516	3.235	0.771	0.9	0.898	74.244	2.764	0.024	0	0	0	448.137	0	32	10	5	5	4	107.812	32	155.14
COc1cc(O[C@@H]2O[C@H](CO)[C@@H](O)[C@H](O)[C@H]2O)c2c(c1)O[C@H](c1ccc(O)cc1)CC2=O	ZINC15 : ZINC000016951757	-6.791	1.45	-2.731	0.304	0.301	0.005	0.286	7.031	52.199	1.516	3.235	0.771	0.9	0.898	74.244	2.764	0.024	0	0	0	448.137	0	32	10	5	5	4	107.812	32	155.14
COc1cc(O[C@H]2C=C(C)OC(=O)C2)c2c(c1)O[C@H](c1ccc(O)cc1)CC2=O	ZINC15 : ZINC001229482505	-4.725	1.832	-5.427	0.963	0.998	0.76	3.7054	49.732	14.147	7.027	3.204	0.042	0.996	0.998	95.389	1.532	0.928	0.305	0.01	0.039	396.121	0	29	7	1	4	4	102.299	29	91.29
COc1cc(O[C@@H]2C=C(C)OC(=O)C2)c2c(c1)O[C@@H](c1ccc(O)cc1)CC2=O	ZINC15 : ZINC001229482503	-4.725	1.832	-5.427	0.963	0.998	0.76	3.7054	49.732	14.147	7.027	3.204	0.042	0.996	0.998	95.389	1.532	0.928	0.305	0.01	0.039	396.121	0	29	7	1	4	4	102.299	29	91.29
COc1cc(O[C@H]2C=C(C)OC(=O)C2)c2c(c1)O[C@@H](c1ccc(O)cc1)CC2=O	ZINC15 : ZINC001229482501	-4.725	1.832	-5.427	0.963	0.998	0.76	3.7054	49.732	14.147	7.027	3.204	0.042	0.996	0.998	95.389	1.532	0.928	0.305	0.01	0.039	396.121	0	29	7	1	4	4	102.299	29	91.29
COc1cc(O[C@@H]2C=C(C)OC(=O)C2)c2c(c1)O[C@H](c1ccc(O)cc1)CC2=O	ZINC15 : ZINC001229482499	-4.725	1.832	-5.427	0.963	0.998	0.76	3.7054	49.732	14.147	7.027	3.204	0.042	0.996	0.998	95.389	1.532	0.928	0.305	0.01	0.039	396.121	0	29	7	1	4	4	102.299	29	91.29
COc1cc(OC2=C(C)[C@H](C)OC2=O)c2c(c1)O[C@H](c1ccc(O)cc1)CC2=O	ZINC15 : ZINC001229476302	-4.751	1.631	-5.355	0.97	0.998	0.632	3.7054	68.527	23.937	11.054	3.563	0.016	0.993	0.945	97.482	1.403	0.76	0.923	0.002	0.01	396.121	0	29	7	1	4	4	102.299	29	91.29
