# Supplementary material for: In-silico assessment of phytochemical derivatives generated using CHEESE webserver for advancement of druggable candidate in pancreatic cancer therapy
Source: In Silico Pharmacol. 2026 Jan 14;14(1):32. doi: 10.1007/s40203-025-00536-w (PMC12804539; doi:10.1007/s40203-025-00536-w)
Supplement: Supplementary file 5 — Supplementary Material 5 [file 40203_2025_536_MOESM5_ESM.xlsx]

## Sheet: Pinostrobin 5-glucoside
smiles	zinc_id	caco2_wang	lipophilicity_astrazeneca	solubility_aqsoldb	bioavailability_ma	hia_hou	pgp_broccatelli	clogp	clearance_hepatocyte_az	clearance_microsome_az	half_life_obach	ld50_zhu	ames	dili	herg	ppbr_az	vdss_lombardo	bbb_martins	cyp2c9_veith	cyp2d6_veith	cyp3a4_veith	molecular_weight	formal_charge	heavy_atoms	h_bond_acceptors	h_bond_donor	rotatable_bonds	num_of_rings	molar_refractivity	number_of_atoms	topological_surface_area_mapping
COC1=CC=C(CN2C(=O)CC(C3=CC=CC=N3)NC2=O)C(OC2CCCC2)=C1	ENAMINE-REAL : PV-004802326878	-4.965	2.74	-4.391	0.999	1	0.493	3.5948	77.814	24.512	15.384	3.104	0.179	0.825	0.696	91.101	-0.031	0.999	0.721	0.127	1	395.185	0	29	5	1	6	4	106.555	29	80.76
COC1=CC=C(CN2C(=O)NC(C3=CN(C)N=N3)C2=O)C(OC2CCCC2)=C1	ENAMINE-REAL : Z3797662750	-4.865	1.178	-4.05	0.998	1	0.454	1.9382	72.307	16.751	6.313	3.332	0.911	0.905	0.484	80.25	0.788	0.715	0.009	0	0.917	385.175	0	28	7	1	6	4	98.7037	28	98.58
COC1=CC=C(C2=NC(C3=C(C)OC=N3)=NO2)C(OC2CCCCC2)=C1	ENAMINE-REAL : Z2160012302	-4.617	3.756	-4.931	0.999	1	0.22	4.42012	100.101	64.94	31.636	2.725	0.02	0.988	0.935	98.81	3.81	0.981	0.912	0	0.992	355.153	0	26	7	0	5	4	94.021	26	83.41
COC1=CC2=C(C(=O)CC2NC(=O)C2(C3=CC(F)=CC=C3F)CC2)C(OC)=C1	ENAMINE-REAL : PV-007119978357	-4.476	2.797	-5.13	1	1	0.007	3.4575	56.861	33.139	21.947	3.66	0.24	0.132	0.977	88.296	5.473	1	0.939	0.002	0.988	387.128	0	28	4	1	5	4	96.6472	28	64.63
COC1=CC=C(C(=O)NC2=C(C)N(CC3=NOC(C)=N3)N=N2)C(OC2CCCCC2)=C1	ENAMINE-REAL : Z2044967864	-5.366	3.02	-5.526	0.998	1	0.94	3.29864	69.903	47.812	12.579	3.159	0.871	0.997	0.98	85.572	0.4	0.274	0.603	0.012	1	426.202	0	31	9	1	7	4	111.344	31	117.19
COC1=CC=C(CN2C(=O)N[C@H]([C@H](C)O)C2=O)C(OC2CCCC2)=C1	ENAMINE-REAL : PV-006581043059	-4.896	1.055	-2.822	0.987	1	0.013	1.8178	45.391	19.72	4.884	2.996	0.034	0.049	0.09	59.187	-0.101	0.651	0.01	0.001	0.005	348.169	0	25	5	2	6	3	90.4285	25	88.1
COC1=CC=C(CN2C(=O)N[C@@H]([C@H](C)O)C2=O)C(OC2CCCC2)=C1	ENAMINE-REAL : Z3499097591	-4.896	1.055	-2.822	0.987	1	0.013	1.8178	45.391	19.72	4.884	2.996	0.034	0.049	0.09	59.187	-0.101	0.651	0.01	0.001	0.005	348.169	0	25	5	2	6	3	90.4285	25	88.1
COC1=CC=C(CN2C(=O)N[C@@H]([C@@H](C)O)C2=O)C(OC2CCCC2)=C1	ENAMINE-REAL : Z2925439329	-4.896	1.055	-2.822	0.987	1	0.013	1.8178	45.391	19.72	4.884	2.996	0.034	0.049	0.09	59.187	-0.101	0.651	0.01	0.001	0.005	348.169	0	25	5	2	6	3	90.4285	25	88.1
COC1=CC=C(CN2C(=O)NC(C(C)O)C2=O)C(OC2CCCC2)=C1	ENAMINE-REAL : Z1869550624	-4.896	1.055	-2.822	0.987	1	0.013	1.8178	45.391	19.72	4.884	2.996	0.034	0.049	0.09	59.187	-0.101	0.651	0.01	0.001	0.005	348.169	0	25	5	2	6	3	90.4285	25	88.1
COC1=CC=C(C(=O)NC2=NC3=C(CC(O)CC3)S2)C(OC2CCCC2)=C1	ENAMINE-REAL : PV-007821800323	-5.106	3.348	-5.078	1	1	0.002	3.575	53.826	49.586	6.603	3.014	0.001	0.971	0.873	96.461	4.323	0.982	0.777	0.013	0.972	388.146	0	27	6	2	5	4	103.977	27	80.68
